# Supplementary material for: Early Urological Source Control Within 6 Hours Is Associated With Reduced Mortality in Critically Ill Patients With Urosepsis: A Retrospective Cohort Study
Source: Research Square preprint supplement (doi:10.21203/rs.3.rs-8438019/v1), 2026-01-13
Supplement: Supplementary file 1 [file c7c4ab3da137bb3d6746ca34.docx]

**Supplementary Table 1. Association between timing of antibiotic initiation and 28-day mortality**

| Variable | Model 1 HR (95% CI) | P value | Model 2 HR (95% CI) | P value | Model 3 HR (95% CI) | P value |
| --- | --- | --- | --- | --- | --- | --- |
| Antibiotics >1 h | Reference | — | Reference | — | Reference | — |
| Antibiotics ≤1 h | 1.39 (0.16–11.92) | 0.763 | 1.24 (0.14–10.98) | 0.847 | 1.32 (0.12–15.14) | 0.822 |

**
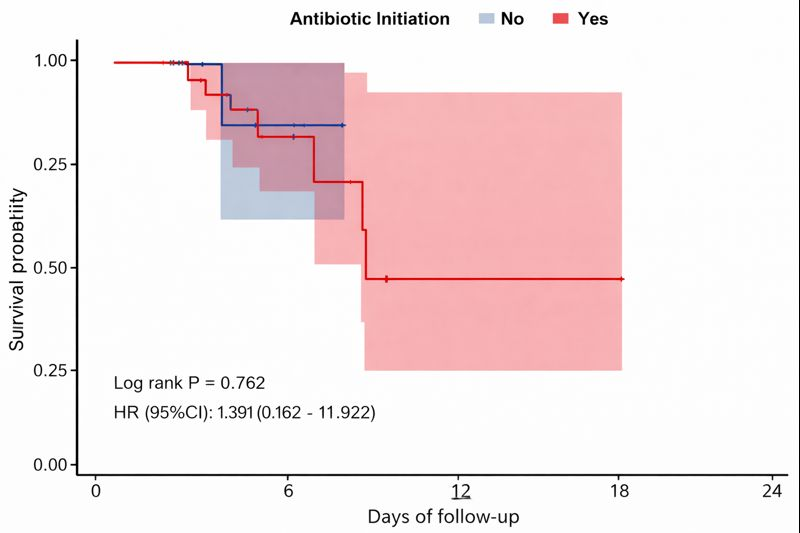
Supplementary Figure 1. Survival stratified by timing of antibiotic initiation**

Kaplan–Meier survival curves comparing patients who received antibiotic therapy within 1 hour of disease onset and those who received antibiotics later. Survival trajectories largely overlapped throughout the observation period, with no significant difference between groups by log-rank test (*P* = 0.762).
